# Supplementary material for: Trends in global tropospheric hydroxyl radical and methane lifetime since 1850 from AerChemMIP
Source: Copernicus journal article supplement (doi:10.5194/acp-2019-1219), 2020-01-16
Supplement: Supplementary file [file acp-2019-1219-AC1-supplement.pdf]

1 **Comments and responses on “Trends in global tropospheric hydroxyl radical and methane lifetime since**  
2 **1850 from AerChemMIP” by David Stevenson et al.**

3  
4 **We would like to thank the two anonymous referees for their useful and supportive comments. Their comments**  
5 **are repeated below with our responses in red.**

6 **Anonymous Referee #1**

7 This paper analyses the OH trend and methane budget in the period 1850-2014. An important conclusion is that  
8 global OH was stable in 1850-1980, after which all three models show an increase of roughly 10%. The analysis  
9 convincingly shows that emission changes in Near-Term Climate Forcers (NO<sub>x</sub> & CO) are responsible for this  
10 behaviour.

11 The manuscript is relatively well prepared, but some improvements are needed, e.g. to the figures, referencing,  
12 and discussion.

13 Throughout the manuscript authors use “concentration”, while I think in practical calculations, tables, and plots  
14 mole fractions are shown. Better to replace concentration by mole fraction.

15  
16 **We have replaced concentration with mole fraction in all instances except for references to OH, which are**  
17 **concentrations (molecules cm<sup>-3</sup>).**

18  
19 Concerning the sensitivity simulations: they are sometimes difficult to understand, but I like the calculated impact  
20 on the methane mixing ratios.

21 All in all, the paper is concise and to the point, and clearly demonstrates that from a modelling point of view, OH  
22 should be increasing. I miss, however, a thorough discussion on the role of climate change on OH (temperature,  
23 natural emissions, lighting NO<sub>x</sub>.) This is certainly something that needs some more attention, also in light of  
24 earlier studies.

25  
26 **We have now added some more information about climate change. We don't have experiments that specifically**  
27 **isolate climate change impacts on OH. However, the difference between the histSST simulations and the sum of**  
28 **(histSST-piCH<sub>4</sub>, histSST-piNTCF and histSST-1950HC) leaves a residual signal that represents the effects of**  
29 **climate change, together with any non-linear interactions between these drivers (see the new Figure 5 below).**  
30 **Assuming these non-linear interactions are negligible, we find that climate change has increased OH, with a**  
31 **similar magnitude to the emissions drivers, and mainly attribute this to increases in water vapour, although other**  
32 **climate change effects may also be important.**

33

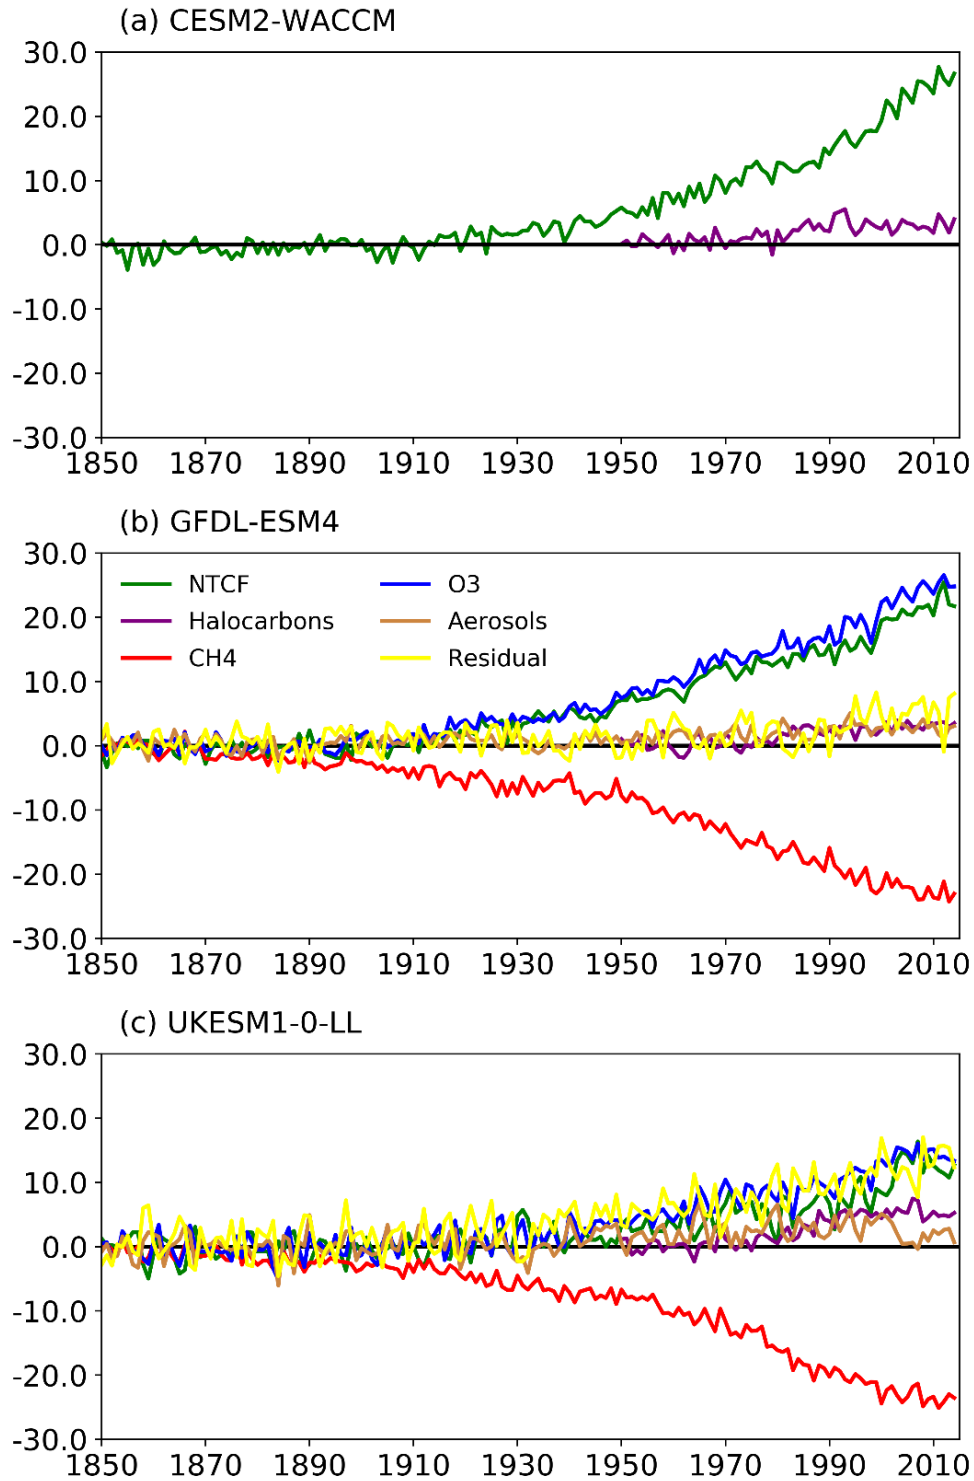

34

35 **Figure 5** Tropospheric OH anomaly (%) for sensitivity experiments (X), expressed as:  $(X -$   
 36  $\text{histSST})/\text{histSST}(1850-1859)$ , for (a) CESM2-WACCM, (b) GFDL-ESM4 and (c) UKESM1-0-LL. ‘Aerosols’ is  
 37 the difference between  $\text{histSST-piO3}$  and  $\text{histSST-piNTCF}$ . ‘Residual’ is the difference between the sum of  
 38  $\text{histSST-piCH4}$ ,  $\text{histSST-piNTCF}$  and  $\text{histSST-1950HC}$  minus  $\text{histSST}$  – and represents the sum of climate  
 39 change effects and non-linear interactions between forcings. NB for UKESM-0-LL, we used historical-piNTCF  
 40 as  $\text{histSST-piNTCF}$  was not available.

41 What also clearly misses is some validation of the model results. I understand that the individual models are (or  
42 will be) published, but to gain some confidence in the results, it would be nice to see how e.g. trends in CO are  
43 reproduced.

44

45 We will refer to some of the other AerChemMIP studies and other relevant papers.

46

47 Minor comments:

48 R4: wrong. H<sub>2</sub>O instead of HO<sub>2</sub>.

49

50 Thank you for pointing out this error. We fixed it.

51

52 Line 62: a sink → a dominant sink

53

54 Fixed.

55

56 Line 67: Wrongly suggests that ozone reacts directly with H<sub>2</sub>O

57

58 Adjusted text to clarify it is O(<sup>1</sup>D) that reacts with H<sub>2</sub>O.

59

60 Line 94: GFDL-ESM4 is later called GFDL-AM4, please be consistent.

61

62 We apologise for inconsistencies in naming in the submitted paper. We have revised to consistently use the model  
63 names: CESM2-WACCM; GFDL-ESM4; and UKESM1-0-LL, based on the Earth System Grid Federation  
64 (ESGF) file names.

65

66 Line 187: Referencing: I miss references to some recent satellite assimilation work which is relevant, e.g.  
67 <https://www.atmos-chem-phys.net/15/8315/2015/acp-15-8315-2015.pdf>

68

69 Thank-you for this and the other Miyazaki et al. papers. We have included discussion of these papers (see below).

70

71 Figure 1: I It would be nice to show also the modelled natural NMVOC emissions and how they changed due to  
72 climate change and variability in the different models.

73

74 Griffiths et al. (2020) Figure 1 has BVOC emissions. We will update Figure 1 to include natural NMVOC  
75 emissions.

76

77 Figure 2: inset: why is the GFDL-ESM4 simulation not included?

78

79 This was a mistake. It is now included.

80

81 Figure 3: The use of the vertical coordinate “model level” is not acceptable.

82

83 We have converted Figures 3 and 4 (and the related figures in the Supplementary Material) to now use pressure  
84 as the vertical co-ordinate.

85

86 Line 214: It would be nice to compare and discuss these new estimates to existing estimates. Methane is forced  
87 to observations, so the lifetime may be biased due to model biases.

88

89 We will compare CH<sub>4</sub> lifetime estimates to existing estimates and discuss potential biases due to experimental  
90 set-up.

91

92 Line 251: I do not see why the values of  $f$  are unreliable due to changes in halocarbon mole fractions.

93

94 Our method for calculating the methane-OH feedback factor,  $f$ , differs from the ‘standard’ method, which would  
95 normally use dedicated sensitivity experiments, with a simple +20% perturbation to prescribed methane mole  
96 fractions (e.g., Prather et al., 1996, 2001). We use the histSST\_piNTCF simulations, which hold NTCFs at pre-  
97 industrial levels, but allow methane to increase. These simulations are not ideal, as they also have climate (i.e.,  
98 temperature, water vapour, clouds, etc.) changing. From the 1950s onwards, these simulations also allow  
99 halocarbons to increase. Elsewhere in the paper, we show that increasing halocarbon levels, and in particular the  
100 associated stratospheric ozone depletion, has an impact on OH. For the diagnosis of  $f$  we need runs that only  
101 perturb methane. Hence we think that when halocarbons also change, the values of  $f$  should be considered  
102 unreliable. Figure 7 suggests that the effect on  $f$  is probably quite small; nevertheless we think it is sensible to just  
103 use values of  $f$  for the time period 1930-1960 to exclude the later time period when halocarbons (and climate)  
104 show larger changes.

105

106 Line 300: Read papers of Miyazaki et al.

107

108 In the revised version we now refer to:

109

110 Miyazaki, K., Eskes, H. J., and Sudo, K.: A tropospheric chemistry reanalysis for the years 2005–2012 based on  
111 an assimilation of OMI, MLS, TES, and MOPITT satellite data, *Atmos. Chem. Phys.*, 15, 8315–8348,  
112 <https://doi.org/10.5194/acp-15-8315-2015>, 2015

113 Miyazaki, K., Eskes, H., Sudo, K., Boersma, K. F., Bowman, K., and Kanaya, Y.: Decadal changes in global  
114 surface NO<sub>x</sub> emissions from multi-constituent satellite data assimilation, *Atmos. Chem. Phys.*, 17, 807–837,  
115 <https://doi.org/10.5194/acp-17-807-2017>, 2017.

116 Miyazaki, K. and Bowman, K.: Evaluation of ACCMIP ozone simulations and ozonesonde sampling biases using  
117 a satellite-based multi-constituent chemical reanalysis, *Atmos. Chem. Phys.*, 17, 8285–8312,  
118 <https://doi.org/10.5194/acp-17-8285-2017>, 2017.

119

120 Miyazaki et al. (2015, 2017) and Miyazaki and Bowman (2017) showed that assimilation of O<sub>3</sub>, CO and NO<sub>2</sub>  
121 satellite data into a 3-D Chemistry-Transport Model (CTM) improved the simulated NH/SH ratio of OH from  
122 1.26 to 1.18 (cf. an observed ratio of  $0.97 \pm 0.12$ , Patra et al., 2014). These studies clearly show that global OH is  
123 sensitive to assimilation of O<sub>3</sub>, CO and NO<sub>2</sub> data, due to the strong coupling between the atmospheric chemistry  
124 of these species.

125 **Anonymous Referee #2**

## 126 **1 Overview:**

127 Review of “Trends in global tropospheric hydroxyl radical and methane lifetime since 1850 from AerChemMIP”  
128 by Stevenson et al.

129 I apologize for the delay in my review. Stevenson et al. present an analysis of changes in OH abundance and  
130 methane lifetime from 1850 to present using simulations from a model intercomparison (CMIP6/AerChemMIP).  
131 Specifically, they use output from 3 models: GFDL-ESM4, CESM2-WACCM, and UKESM1. The three models  
132 simulate stable OH concentrations prior to 1980 and an increase post 1980. The work then uses a set of sensitivity  
133 simulations to diagnose the processes that control the time evolution of OH. Overall, I think the work is both  
134 useful and interesting. My main comments relate to the presentation of the interpretation. Specifically, the  
135 discussion regarding conflicts with observational MCF constraints and the brevity of the final discussion (there’s  
136 only half a page of discussion after laying a solid groundwork in the methods). I feel like this could be expanded  
137 to make the work more useful to others. I would suggest minor revisions for the work.

## 138 **2 Comments:**

### 139 **2.1 Discussion of MCF constraints**

140 The authors seem to be arguing that these model-derived forward simulations of OH are more reliable than  
141 reconstructions.

142

143 **It was not our intention to present the results this way, and we don’t think the model results are more reliable than**  
144 **the reconstructions. We attempted to present the model results and give the OH reconstructions as context, in**  
145 **order to facilitate comparison. We now include uncertainties in the reconstructions from Rigby et al. (2017), which**  
146 **help clarify this comparison.**

147

148 I’d be wary of framing it this way as this paper has ZERO observational constraints.

149

150 **This is not quite true – global mean surface methane concentrations are prescribed to evolve following observed**  
151 **levels. Hence the calculated OH values in our paper are consistent with the evolution of observed global mean**  
152 **methane.**

153

154 On their face, the results differ from observationally constrained OH estimates and this is the interpretation from  
155 the authors (Line 3 in the abstract); however, I'm not convinced they really differ. If the authors were to include  
156 the uncertainty estimates from the Rigby et al. (2017) paper, for example, they would likely find that it bounds  
157 their results (the uncertainties are included in the supplemental data from the Rigby paper). So I think some of the  
158 "disagreement" they see is within the uncertainties.

159

160 We broadly agree with this (see details below).

161

162 Additionally, the OH changes here do seem to agree quite well with the results from Turner et al. (2017) up until  
163 2005. One could argue there is a divergence post-2005, but the authors don't really seem to discuss this at all.

164 The authors seem to argue that the entire post-1980 rise differs from the MCF-derived estimates. This is curious  
165 to me.

166 I feel that line 3 of the abstract ("The model-derived OH trend since 1980 differs from trends found in several  
167 studies that infer OH from inversions of methyl chloroform measurements; however, these inversions are poorly  
168 constrained and contain large uncertainties that do not rule out the possibility of recent positive OH trends.") and  
169 some of the main text discussion of the MCF reconstructions needs to be rephrased.

170

171 See below – we now have included the uncertainty estimates from Rigby et al. (2017) into a revised Figure 2 and  
172 will adjust the text accordingly. We agree with the reviewer that the AerChemMIP modelled OH trends are (just  
173 about) within the uncertainty range derived by Rigby et al. (2017).

174

175 The authors seem to have missed two important papers from Joe McNorton as well:

176 McNorton et al. (2016; <https://doi.org/10.5194/acp-16-7943-2016>) and McNorton et al. (2018;  
177 <https://doi.org/10.5194/acp-18-18149-2018>).

178 There are two other recent papers that should also be referenced and briefly discussed:

179 He et al. (2020; <https://doi.org/10.5194/acp-20-805-2020>) and Nguyen et al. (2020;  
180 <https://doi.org/10.1029/2019GL085706>). He et al. (2020) also used the GFDL model to simulate methane from  
181 1980 to present and find a similar time evolution of OH.

182 Nguyen et al. (2020) look at the impact of chemical cycling on methane and OH.

183

184 These papers are all very relevant and we will incorporate discussion of them into the revised text. McNorton et  
185 al. (2016) performed inverse modelling using a 3-D Chemistry-Transport Model (CTM) constrained by MCF data,  
186 and found that OH increases contributed significantly to the slowdown in the CH<sub>4</sub> growth rate between 1999 and  
187 2006, and that the post-2007 increases in CH<sub>4</sub> growth rate were poorly simulated if OH variations were ignored.  
188 McNorton et al. (2018) extended this work with further constraints from GOSAT CH<sub>4</sub> and δ<sup>13</sup>CH<sub>4</sub> and found that  
189 the post-2007 CH<sub>4</sub> growth rate surge was most likely due to a combination of a decrease (-1.8 ± 0.4 %) in global  
190 OH and increases in CH<sub>4</sub> emissions, although an alternative inversion that assumed fixed OH indicated slightly  
191 larger increases in CH<sub>4</sub> emissions. He et al. (2020) used the GFDL-AM4 model, which is the atmospheric  
192 component of the GFDL-ESM4 used in this study, and found an upward trend in global OH since 1980 similar in  
193 magnitude to our results. Like Gaubert et al. (2017), Nguyen et al. (2020) found that decreasing global CO

194 concentrations since the 2000s have important influences on CH<sub>4</sub> flux inversion results, because of the strong  
195 chemical coupling between CO, CH<sub>4</sub> and OH.  
196 Collectively, all these earlier studies that have attempted to interpret the observed trends in methane and related  
197 species find that OH is sensitive to CO, NO<sub>2</sub>, O<sub>3</sub>, as well as CH<sub>4</sub>. These studies have spanned box models to  
198 sophisticated 3-D CTMs, and all appear to be under-constrained in deriving trends in OH. To date, studies have  
199 used subsets of the available observational data (e.g., one or more of MCF, CH<sub>4</sub>, δ<sup>13</sup>CH<sub>4</sub>, CO, <sup>14</sup>CO, NO<sub>2</sub>, and  
200 O<sub>3</sub>), but not yet all available relevant data. The OH trends presented in this study are from state-of-the-art Earth  
201 System Models driven by up-to-date emissions estimates from CMIP6, and are consistent with observed trends in  
202 CH<sub>4</sub>, however other species (e.g., CO, O<sub>3</sub> and NO<sub>2</sub>) are allowed to freely evolve. It is unclear if the OH trends  
203 simulated by these CMIP6 models are realistic, however, it is clear that the way these models simulate OH is very  
204 important for projecting future trends (and understanding past trends) in CH<sub>4</sub>.

205

## 206 **2.2 Processes controlling the OH changes**

207 It would be nice if the authors had one additional schematic type figure that summarizes their findings. There are  
208 quite a few acronyms and competing effects that make it confusing at times. Naik et al. (2013) paper had some  
209 nice bar charts showing the relative contribution of different factors to the PI-PD OH changes. This really helped  
210 follow the argument and understand what the different scenarios are doing. It seems like this would be particularly  
211 helpful to the casual reader.

212 As it stands, Figures 5 and 6 are the ones that diagnose the processes controlling the long-term OH changes in the  
213 model. But I can imagine many readers having a difficult time figuring out what they are supposed to take away  
214 from those figures. As it stands, they are an acronym soup.

215 Personally, I feel that the manuscript would greatly benefit from a final synthesis figure that summarizes the  
216 changes described in the abstract and a few additional paragraphs in the discussion section describing this.

217

218

219 We have constructed a new figure (Figure 8) that summarizes the drivers of OH changes – this also includes a  
 220 residual term, that we think mainly reflects climate change effects:

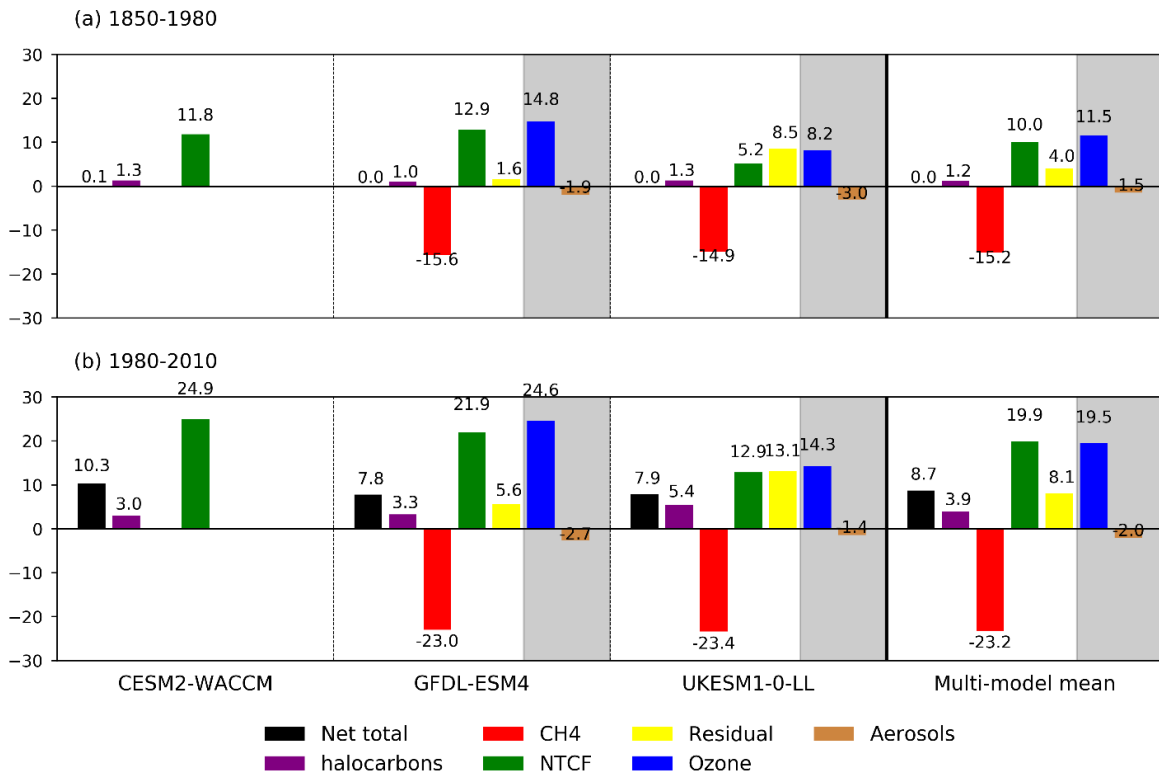

221  
 222 **Figure 8.** Summary of drivers of OH changes (%), relative to 1850, for the three models and their multi-model  
 223 mean over: (a) 1850-1980; and (b) 1980-2010. (NB we have used decadal means: 1850 refers to (1850-1859);  
 224 1980 is (1975-1984); and 2010 is (2005-2014). The shaded areas show the split of the NTCF signal (green) into  
 225 ozone precursors (blue) and aerosols (brown), where models have performed both the histSST-piNTCF and  
 226 histSST-piO3 experiments. The residual values (yellow) are the differences between the total change (black, from  
 227 the histSST simulations) and the sum of the changes from CH4 (red), NTCF, and halocarbons (purple). We  
 228 interpret the residual terms as being due to climate change, in addition to any non-linear interactions between  
 229 forcings.

230 **3 Specific comments:**

231 Lines 180–185 (Inserted the relevant lines from the discussion paper here)

232 “Naus et al. (2019) further investigated the inversion methods used by Rigby et al. (2017) and Turner et al. (2017),  
 233 confirming that the derivation of OH from MCF and CH4 is a strongly under-constrained problem, and found that  
 234 estimated OH trends with a range of different magnitudes and signs are equally valid solutions from the available  
 235 data.”

236 and 280–283

237 “Naus et al. (2019) found that the uncertainties inherent in inversion of MCF and other proxy measures of OH are  
 238 sufficiently large that OH trends derived from them are less constrained than previously thought, and that positive  
 239 recent OH trends are compatible with the MCF measurements.”



240

241 : I'm confused here, I thought the Rigby et al. (2017) and Turner et al. (2017) paper showed that the problem was  
242 under-constrained. If I recall, the Turner paper showed they could fit the data without changing OH and that there  
243 were a number of valid solutions. It's not clear what the Naus et al. (2019) paper added?

244

245 The Naus et al. (2019) study nicely illustrates the uncertainties discussed and presented in Rigby et al. (2017). We  
246 retain discussion of Naus et al. (2019) in the revised paper, whilst acknowledging that Rigby et al. (2017)  
247 quantified uncertainties earlier.

248

249 Lines 198–200

250 “The published inferred trends from different inversion methods show a range of different trends, but there is little  
251 resemblance to the upwards trends simulated by the models over this time period.”

252 and 277–280

253 “The strong recent increase is at odds with several studies that use MCF and other proxies to reconstruct OH  
254 trends (e.g., Figure 2 inset); however, these show a wide range of trends.”

255

256 This is the discussion that I would disagree with. The model results don't seem that different from the model  
257 results (especially if you include error bars from Rigby). You might be able to argue differences post-2005, but  
258 1980-2005 seem to be in pretty good agreement. The He et al. (2020) paper also looks at this.

259

260 We will revise this discussion, based on a new version of Figure 2 (below), incorporating uncertainties from Rigby  
261 et al (2017).

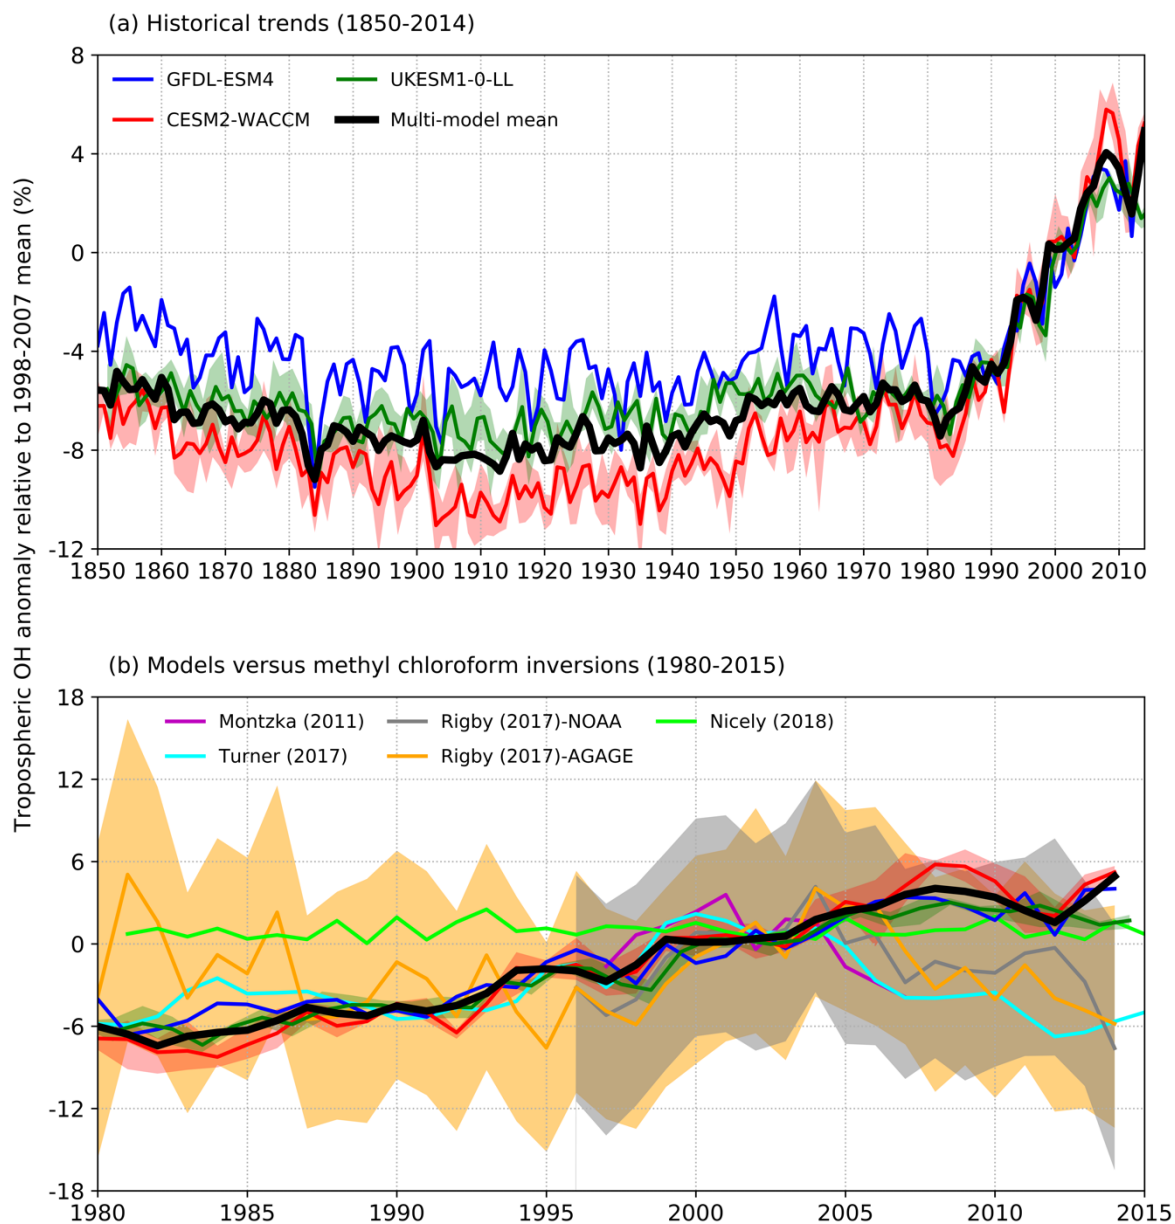

262  
 263  
 264  
 265  
 266  
 267

**Figure 2** (a) Time evolution of global annual mean tropospheric OH (1850-2014), expressed as a percentage anomaly relative to the 1998-2007 mean (and ensemble spreads, where available) for GFDL-ESM4 (blue), UKESM1-0-LL (green), and CESM2-WACCM (red), and the multi-model mean (black). (b) Observation-based inversions of global annual mean tropospheric OH for 1980-2015, including  $\pm 1$  standard deviation uncertainties for the results from Rigby et al. (2017), with model results from panel (a) overlain.

270 The new Figure 2 shows that the AerChemMIP modelled trends are (just about) within the uncertainties of the observation-based estimates of OH. So as the reviewer notes, they are consistent. The model trends do however go from being at the lower end of the uncertainty range in 1980 to the upper edge of the range in 2014. We will adjust the text and discussion accordingly.
